# Supplementary material for: Copper excess reduces nitrate uptake by Arabidopsis roots with specific effects on gene expression
Source: PubMed Central journal article supplement (PMC6090090; doi:10.1016/j.jplph.2018.06.005), 2018-09
Supplement: mmc1.pdf [file mmc1.pdf]

## **Copper excess reduces nitrate uptake by *Arabidopsis* roots with specific effects on gene expression**

Franz W.R. Hippler<sup>a,b</sup>, Dirceu Mattos-Jr<sup>a</sup>, Rodrigo M. Boaretto<sup>a</sup>, Lorraine E. Williams<sup>b</sup>

<sup>a</sup>Centro de Citricultura Sylvio Moreira, Instituto Agrônomo (IAC), Rod. Anhanguera, km 158, CP 04, CEP 13490-970, Cordeirópolis, SP, Brazil.

<sup>b</sup>University of Southampton, Biological Sciences, Building 85, Highfield, Southampton SO17 1BJ, United Kingdom

**SUPPLEMENTARY FILE**

**Supporting Information Table S1.** Genes and primers analysed in roots of *Arabidopsis thaliana* grown under varying copper (Cu) concentrations.

| Gene                                        | Locus identification <sup>1</sup> | Forward primer (5' to 3') | Reverse Primer (5' to 3') |
|---------------------------------------------|-----------------------------------|---------------------------|---------------------------|
| <b>Nitrate transporters</b>                 |                                   |                           |                           |
| <i>NRT1.1 (NPF6.3 or CHL1)</i>              | AT1G12110                         | GGCCGTA CTTGTTGCCTTGA     | CCCATTGGAATACTCGGCTCA     |
| <i>NRT1.2</i>                               | AT1G69850                         | AGCTCAGGGAACACACCTTG      | ACGCATTGCCCAAAGAGGT       |
| <i>NRT1.5</i>                               | AT1G32450                         | CGAGCATTGACCTGGTGGTA      | CGTTCCTCTTCACTCTCGGT      |
| <i>NRT2.1</i>                               | AT1G08090                         | CATCAAGGAAGCCTCCGGTT      | TGTTGGGTGTGTTCTCAGGC      |
| <i>NRT2.2</i>                               | AT1G08100                         | CGACGCTACGGAGCACTATT      | GTTGCGTTCCTTTGTGGAC       |
| <i>NRT2.4</i>                               | AT5G60770                         | CACGGAACAAGGGCTGACA       | TCATCTTCCGTGGAAGGCAA      |
| <i>NAR2.1 (NRT3.1)</i>                      | AT5G50200                         | CGCCACGCGTCCCTAGATA       | CTTGGCCTTCTTCTCATTG       |
| <b>Plasma membrane H<sup>+</sup>-ATPase</b> |                                   |                           |                           |
| <i>AHA1</i>                                 | AT2G18960                         | TAGCTAGGCTTAGGGAGCTTCA    | CAGTGTAGTGATGTCCTGCTGT    |
| <i>AHA2</i>                                 | AT4G30190                         | GAGCTGAGATCGCTAGGCTT      | CTACACAGTGTAGTACTGGGAG    |
| <i>AHA5</i>                                 | AT2G24520                         | AACCCTCCACGGACTTCAAC      | CTCTCTCAGCCTGACAACCTC     |
| <b>Nitrate reductase</b>                    |                                   |                           |                           |
| <i>NR1 (NIA1)</i>                           | AT1G77760                         | TGGTACGTCGTTGAAATCGC      | TCCCTAAGCACAGCTTCAGTT     |
| <b>bZIP transcription factors</b>           |                                   |                           |                           |
| <i>TGA1</i>                                 | AT5G65210                         | GACAAGCGGCTCGAGGATTA      | GTTACGATGTCGAGTTGCC       |
| <i>TGA4</i>                                 | AT5G10030                         | GGAGTTTGCTGGTGAGTGGA      | TCCTTTAGCCGCAAGACAAGA     |
| <b>Lipoxygenase</b>                         |                                   |                           |                           |
| <i>LOX1</i>                                 | AT1G55020                         | GATGAGAGGAACGACGACGAG     | CGCCTTCACTGCTCGGAAAC      |
| <b>Housekeeping genes</b>                   |                                   |                           |                           |
| <i>SAND</i>                                 | AT2G28390                         | GGTGGATGTTGGAGAGCATT      | CCAAACAAGAAGTGGATCCC      |
| <i>YLS8</i>                                 | AT5G08290                         | CTTCTCCACATCTGCACTCC      | CAGTTCACGGGATATTCAGC      |

<sup>1</sup> NCBI data base - (<http://www.ncbi.nlm.nih.gov>)

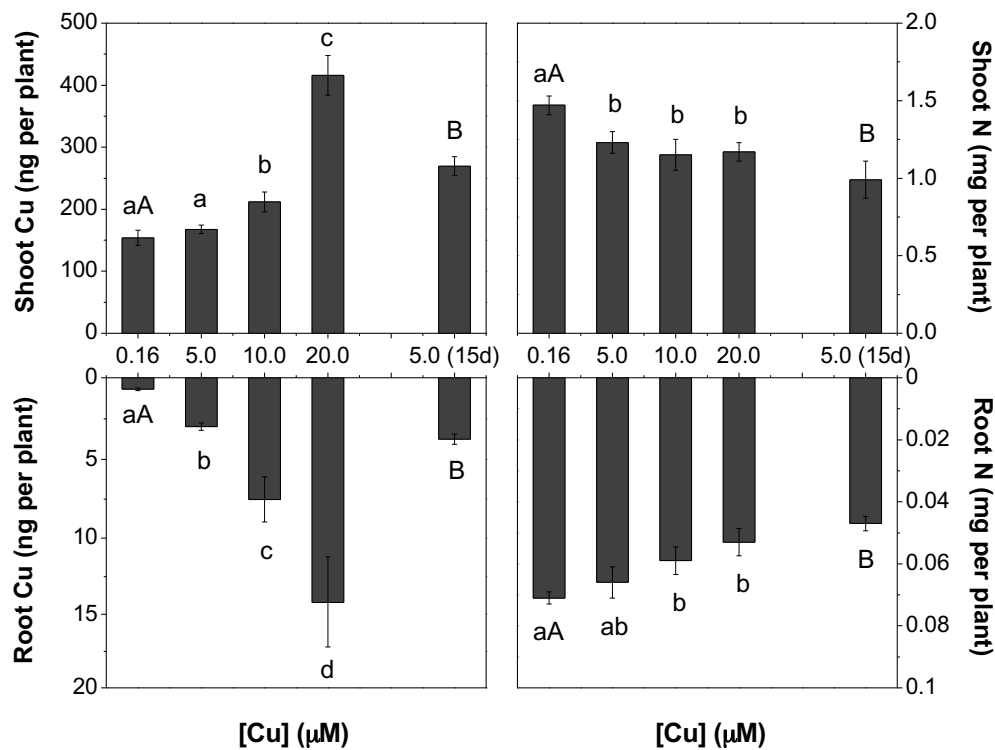

**Fig. S1. Elevated copper in the media (Cu) enhanced Cu accumulation but reduced the accumulation of nitrogen (N) in shoot and root of *Arabidopsis thaliana*.** Plants were supplied with different Cu levels in the nutrient solution for 72 h or 15 days (15d). Mean (+/- SEM) are shown (n = 3). For the Cu treatments for 72 h different lowercase letters indicate mean values are significantly different among the [Cu] (0.16, 5.0, 10.0 and 20.0 μM) by Tukey's test (p < 0.05). For the Cu treatments for 15 days different uppercase letters indicate mean values are significantly different between the [Cu] (0.16 and 5.0 μM) by Tukey's test (p < 0.05).

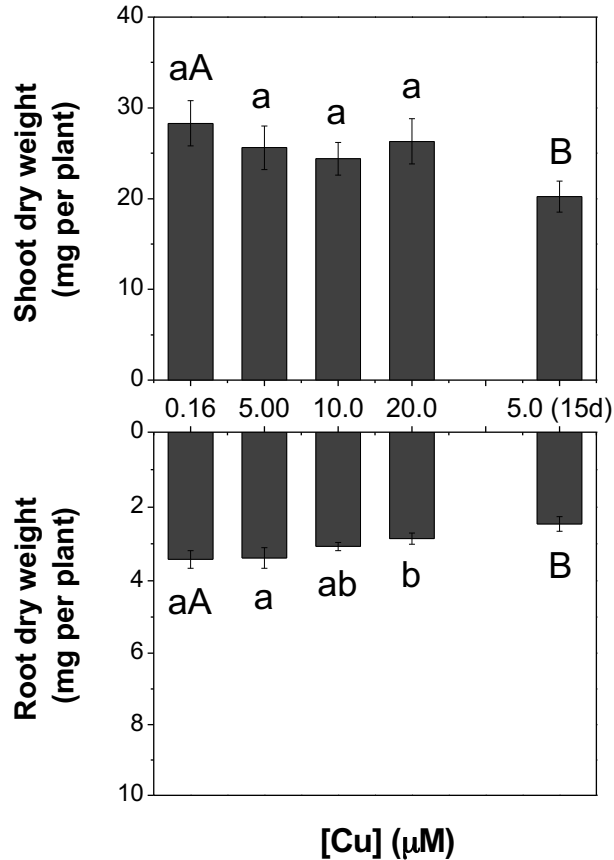

**Fig. S2. Elevated copper (Cu) negatively impacts dry weight** of shoots and roots of *Arabidopsis thaliana*. Plants were grown under hydroponic conditions for up to 72 h or 15 days (15d). Mean ( $\pm$  SEM) are shown ( $n = 3$ ). For the Cu treatments for 72 h different lowercase letters indicate mean values are significantly different among the [Cu] (0.16, 5.0, 10.0 and 20.0  $\mu\text{M}$ ) by Tukey's test ( $p < 0.05$ ). For the Cu treatments for 15 days different uppercase letters indicate mean values are significantly different between the [Cu] (0.16 and 5.0  $\mu\text{M}$ ) by Tukey's test ( $p < 0.05$ ). White line in the image represent 2 cm.

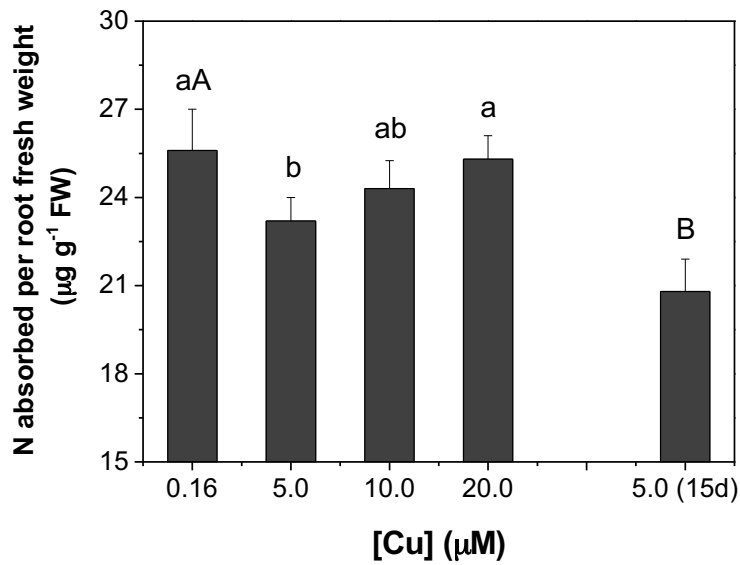

**Fig. S3. Elevated copper in the media (Cu) disturbed N absorption per root fresh weight of *Arabidopsis thaliana*.** Plants were supplied with different Cu levels in the nutrient solution for 72 h or 15 days (15d). Mean (+/- SEM) are shown (n = 3). For the Cu treatments for 72 h different lowercase letters indicate mean values are significantly different among the [Cu] (0.16, 5.0, 10.0 and 20.0 µM) by Tukey's test ( $p < 0.05$ ). For the Cu treatments for 15 days different uppercase letters indicate mean values are significantly different between the [Cu] (0.16 and 5.0 µM) by Tukey's test ( $p < 0.05$ ).
